# Supplementary material for: Future Prescribers and Antibiotic Prescribing: A Nationwide Cross-sectional Survey from Final Year Medical and Dental Students on the Preparedness to Prescribe Antibiotics
Source: Research Square preprint supplement (doi:10.21203/rs.3.rs-7491488/v1), 2025-10-07
Supplement: Supplementary file 1 [file ecb2eccef65af8570b23dd46.docx]

**Do medical students feel prepared to prescribe antibiotics responsibly? A nationwide survey from final year students**

**Survey introduction**

The purpose of this study is to learn how medical students in Pakistan are taught about antibiotic prescribing and using antibiotics appropriately (prudent use of antibiotics) we greatly appreciate your completion of the survey. The results will be used to suggest improvements to existing curricula, and will be published in national or international peer reviewed journal. Your name or any other information will remain confidential and will not be declared anywhere. This survey will take 10 minutes to complete please try to answer all questions. All responses are anonymous and will be stored confidentially. We however, need your consent to take data from you.

Signature________________

Student Code _____________

Date of Survey_____________

**Demographics question**

1 How old are you? (In years) ___________

2 What is your sex?

a) Male b) Female

3 Are you a citizen of the country in which you are studying medicine?

1. Yes b) No

4 When will you complete your medical studies? Year_____ Month _____

5 Your institute is private or Governmental? _______________

6 Which medical school are you studying at? _______________

7 City in which your medical institute is located? _______________

**Curriculum content: principles for prudent use of antibiotics**

Please note that this is the longest section of the survey

This section will ask how well you feel about the studies at the medical school have prepared for you for your practice as a junior doctor on the following topic of prudent use of antibiotic (including all courses, lectures clinical placements training at bed sides, exams and self-directed learning)

For each question, please respond “I feel (1=not at all prepared, 4 sufficiently prepared, 7 very prepared) to….” . If there are questions where you have not had any teachings, please select no teaching provided, irrespective of how well prepared you feel on that topic.

**8 Diagnosis of infection**

I feel…… (Tick in the Box)

| **Statement** | **No teaching was provided** | **1 ( not at all prepared)** | **Moderately** | **3** | **4 (sufficiently prepared)** | **5** | **6** | **7(well prepared)** | **I am unsure how I feel)** | **I don’t understand the question** |
| --- | --- | --- | --- | --- | --- | --- | --- | --- | --- | --- |
| To recognize the clinical sign and symptoms | 🞏 | 🞏 | 🞏 | 🞏 | 🞏 | 🞏 | 🞏 | 🞏 | 🞏 | 🞏 |
| To assess the clinical severity (e.g using the criteria such as the septic shock criteria) | 🞏 | 🞏 | 🞏 | 🞏 | 🞏 | 🞏 | 🞏 | 🞏 | 🞏 | 🞏 |
| To use point –of- care tests (e.g urine dipstick, rapid diagnostic test for streptococcul pharyngitis) | 🞏 | 🞏 | 🞏 | 🞏 | 🞏 | 🞏 | 🞏 | 🞏 | 🞏 | 🞏 |
| To interpret biochemical markers of inflammation (e.g CRP) | 🞏 | 🞏 | 🞏 | 🞏 | 🞏 | 🞏 | 🞏 | 🞏 | 🞏 | 🞏 |
| To decide when it is important to take microbiological samples before starting antibiotic therapy | 🞏 | 🞏 | 🞏 | 🞏 | 🞏 | 🞏 | 🞏 | 🞏 | 🞏 | 🞏 |
| To interpret basic microbiological investigations (e.g blood cultures) | 🞏 | 🞏 | 🞏 | 🞏 | 🞏 | 🞏 | 🞏 | 🞏 | 🞏 | 🞏 |

**9: Indications for no antibiotic treatment**

I feel….. (Tick in the appropriate Box)

| **Statement** | **No teaching was provided** | **1 ( not at all prepared)** | **2** | **3** | **4 (sufficiently prepared)** | **5** | **6** | **7(well prepared)** | **I am unsure how I feel)** | **I don’t understand the question** |
| --- | --- | --- | --- | --- | --- | --- | --- | --- | --- | --- |
| To identify clinical situation when not to prescribe an antibiotic | 🞏 | 🞏 | 🞏 | 🞏 | 🞏 | 🞏 | 🞏 | 🞏 | 🞏 | 🞏 |
| To differentiate between bacterial colonization and infection (e.g symptomatic beteriuria) | 🞏 | 🞏 | 🞏 | 🞏 | 🞏 | 🞏 | 🞏 | 🞏 | 🞏 | 🞏 |
| To differentiate between bacterial and viral upper respiratory tract infection. | 🞏 | 🞏 | 🞏 | 🞏 | 🞏 | 🞏 | 🞏 | 🞏 | 🞏 | 🞏 |

**10: Initial antibiotic therapy**

I feel… (Tick the appropriate Box)

| **Statement** | **No teaching was provided** | **1 ( not at all prepared)** | **2** | **3** | **4 (sufficiently prepared)** | **5** | **6** | **7(well prepared)** | **I am unsure how I feel)** | **I don’t understand the question** |
| --- | --- | --- | --- | --- | --- | --- | --- | --- | --- | --- |
| To select initial empirical therapy based on the most likely pathogen(s) and antibiotic resistant pattern without using guidelines | 🞏 | 🞏 | 🞏 | 🞏 | 🞏 | 🞏 | 🞏 | 🞏 | 🞏 | 🞏 |
| To decide the urgency of antibiotic administration in different situations (e.g<1 hour for severe sepsis, non-urgent for chronic bone infection) | 🞏 | 🞏 | 🞏 | 🞏 | 🞏 | 🞏 | 🞏 | 🞏 | 🞏 | 🞏 |
| To prescribe antibiotic therapy according to national guidelines | 🞏 | 🞏 | 🞏 | 🞏 | 🞏 | 🞏 | 🞏 | 🞏 | 🞏 | 🞏 |
| To asses antibiotic allergies (e.g differentiating between anaphylaxis and hypersensitivity) | 🞏 | 🞏 | 🞏 | 🞏 | 🞏 | 🞏 | 🞏 | 🞏 | 🞏 | 🞏 |
| To decide indications for combination therapy | 🞏 | 🞏 | 🞏 | 🞏 | 🞏 | 🞏 | 🞏 | 🞏 | 🞏 | 🞏 |
| To decide the shortest possible adequate duration of antibiotic therapy for a specific infection | 🞏 | 🞏 | 🞏 | 🞏 | 🞏 | 🞏 | 🞏 | 🞏 | 🞏 | 🞏 |
| To prescribe using principles of surgical antibiotic prophylaxis | 🞏 | 🞏 | 🞏 | 🞏 | 🞏 | 🞏 | 🞏 | 🞏 | 🞏 | 🞏 |

**11 Reassessment of antibiotic therapy**

I feel…. (Tick the appropriate Box)

| **Statement** | **No teaching was provided** | **1 ( not at all prepared)** | **2** | **3** | **4 (sufficiently prepared)** | **5** | **6** | **7(well prepared)** | **I am unsure how I feel)** | **I don’t understand the question** |
| --- | --- | --- | --- | --- | --- | --- | --- | --- | --- | --- |
| To review the need to continue or change antibiotic therapy after 48-72 hours based on clinical evolution and laboratory results | 🞏 | 🞏 | 🞏 | 🞏 | 🞏 | 🞏 | 🞏 | 🞏 | 🞏 | 🞏 |
| To assess clinical outcomes and possible reasons for failure of antibiotic treatment | 🞏 | 🞏 | 🞏 | 🞏 | 🞏 | 🞏 | 🞏 | 🞏 | 🞏 | 🞏 |
| To decide when to switch from intravenous (IV) to oral antibiotic therapy | 🞏 | 🞏 | 🞏 | 🞏 | 🞏 | 🞏 | 🞏 | 🞏 | 🞏 | 🞏 |

**12 Quality of Care**

I feel…. (Tick the appropriate Box)

| **Statement** | **No teaching was provided** | **1 ( not at all prepared)** | **2** | **3** | **4 (sufficiently prepared)** | **5** | **6** | **7(well prepared)** | **I am unsure how I feel)** | **I don’t understand the question** |
| --- | --- | --- | --- | --- | --- | --- | --- | --- | --- | --- |
| To measure/audit antibiotic use in a clinical setting, and to interpret the results of such studies | 🞏 | 🞏 | 🞏 | 🞏 | 🞏 | 🞏 | 🞏 | 🞏 | 🞏 | 🞏 |
| To work within the multi disciplinary team in managing antibiotic use in hospital. | 🞏 | 🞏 | 🞏 | 🞏 | 🞏 | 🞏 | 🞏 | 🞏 | 🞏 | 🞏 |
| To discuss antibiotic use with patient who are asking for antibiotic , when I feel they are not necessary | 🞏 | 🞏 | 🞏 | 🞏 | 🞏 | 🞏 | 🞏 | 🞏 | 🞏 | 🞏 |
| To communicate with senior doctors in situation where I feel antibiotics are not necessary, but I feel I am being inappropriately pressured into prescribing antibiotic by senior doctors | 🞏 | 🞏 | 🞏 | 🞏 | 🞏 | 🞏 | 🞏 | 🞏 | 🞏 | 🞏 |

**14 Antibiotic resistances**

I feel…. (Tick the appropriate Box)

| **Statement** | **No teaching was provided** | **1 ( not at all prepared)** | **2** | **3** | **4 (sufficiently prepared)** | **5** | **6** | **7(well prepared)** | **I am unsure how I feel)** | **I don’t understand the question** |
| --- | --- | --- | --- | --- | --- | --- | --- | --- | --- | --- |
| To use knowledge of the common mechanism of antibiotic resistance in pathogen | 🞏 | 🞏 | 🞏 | 🞏 | 🞏 | 🞏 | 🞏 | 🞏 | 🞏 | 🞏 |
| To use knowledge of epidemiology of bacterial resistance, including local/regional variations | 🞏 | 🞏 | 🞏 | 🞏 | 🞏 | 🞏 | 🞏 | 🞏 | 🞏 | 🞏 |
| To practice effective infection control and hygiene (to prevent spread of bacteria ) | 🞏 | 🞏 | 🞏 | 🞏 | 🞏 | 🞏 | 🞏 | 🞏 | 🞏 | 🞏 |
| To use knowledge of the negative consequences of antibiotic use ( bacterial resistance, toxic/adverse effects, cost, clostridium difficale infection) | 🞏 | 🞏 | 🞏 | 🞏 | 🞏 | 🞏 | 🞏 | 🞏 | 🞏 | 🞏 |

**Teaching methods used for antibiotic education**

**15 Which of the following methods have been used at your medical school for teaching about the prudent use of antibiotics (The topic from the previous set of questions), and how useful they are?**

| **Method** | **Method not used** | **Not at all useful** | **Neutral** | **Useful** | **Very useful** | **I am unsure** | **I donot understand the question** |
| --- | --- | --- | --- | --- | --- | --- | --- |
| Lectures (with >15people) | 🞏 | 🞏 | 🞏 | 🞏 | 🞏 | 🞏 | 🞏 |
| Small group teaching(<15 students) | 🞏 | 🞏 | 🞏 | 🞏 | 🞏 | 🞏 | 🞏 |
| Discussions of clinical cases | 🞏 | 🞏 | 🞏 | 🞏 | 🞏 | 🞏 | 🞏 |
| Active learning assignments (e.g article reading, group work) | 🞏 | 🞏 | 🞏 | 🞏 | 🞏 | 🞏 | 🞏 |
| E-learning | 🞏 | 🞏 | 🞏 | 🞏 | 🞏 | 🞏 | 🞏 |
| Role play or communication skills session dealing with patient demanding antibiotic therapy | 🞏 | 🞏 | 🞏 | 🞏 | 🞏 | 🞏 | 🞏 |
| Infectious disease clinical placement (i.e clinical rotation or training in infectious disease, involving patients | 🞏 | 🞏 | 🞏 | 🞏 | 🞏 | 🞏 | 🞏 |
| Microbiology clinical placements | 🞏 | 🞏 | 🞏 | 🞏 | 🞏 | 🞏 | 🞏 |
| Peer or near-peer teaching( teaching lead by other students, or recently qualified doctors ) | 🞏 | 🞏 | 🞏 | 🞏 | 🞏 | 🞏 | 🞏 |

**Other methods often used ______________**

**16 Overall, do you feel you have received sufficient teaching at medical school in antibiotic use for your future practice as a junior doctor?**

1. Yes
2. No I feel I had enough teaching on general antibiotic treatment, but I need more on prudent antibiotic use
3. No, I feel I need more education on both general antibiotic treatment and prudent antibiotic use
4. I am unsure
5. Others please specify_________________

**17 Have any of your medical school examination included questions on antibiotic treatment?**

1. Yes
2. No
3. Unsure
4. Other Please specify________________

**18 How do you think teaching on antibiotic treatment and prudent use can be improved?**

**19 How did you find the language in this study?**

1. I could understand everything or almost everything.
2. I could understand the most questions, it was right for the survey to be in English.
3. Many questions were difficult to understand, I would have preferred the survey in my native language.
4. Most of the survey questions were difficult to understand, I would have preferred the survey in my native language.
5. Other please specify__________________
